# Supplementary material for: Consumer Attitudes towards Food Preservation Methods
Source: MDPI journal article supplement (doi:10.3390/foods11091349), 2022-05-06
Supplement: s1 [file s1]

## Supplementary material

**Table S1. Post Hoc Comparisons - Methods**

|     |     | Mean Difference | SE    | t       | Cohen's d | p <sub>holm</sub> |
|-----|-----|-----------------|-------|---------|-----------|-------------------|
| PRE | IRR | 0.259           | 0.096 | 2.707   | 0.135     | 0.027             |
|     | RWV | -0.163          | 0.096 | -1.702  | -0.085    | 0.089             |
|     | MAP | -1.437          | 0.096 | -15.007 | -0.746    | < .001            |
|     | STE | -2.072          | 0.096 | -21.634 | -1.075    | < .001            |
|     | PAS | -2.741          | 0.096 | -28.622 | -1.422    | < .001            |
|     | HPP | -1.817          | 0.096 | -18.978 | -0.943    | < .001            |
|     | MWV | -0.373          | 0.096 | -3.894  | -0.193    | < .001            |
| IRR | RWV | -0.422          | 0.096 | -4.409  | -0.219    | < .001            |
|     | MAP | -1.696          | 0.096 | -17.714 | -0.880    | < .001            |
|     | STE | -2.331          | 0.096 | -24.341 | -1.210    | < .001            |
|     | PAS | -3.000          | 0.096 | -31.329 | -1.557    | < .001            |
|     | HPP | -2.077          | 0.096 | -21.685 | -1.078    | < .001            |
|     | MWV | -0.632          | 0.096 | -6.601  | -0.328    | < .001            |
|     |     |                 |       |         |           |                   |
| RWV | MAP | -1.274          | 0.096 | -13.305 | -0.661    | < .001            |
|     | STE | -1.909          | 0.096 | -19.932 | -0.990    | < .001            |
|     | PAS | -2.578          | 0.096 | -26.920 | -1.338    | < .001            |
|     | HPP | -1.654          | 0.096 | -17.276 | -0.858    | < .001            |
|     | MWV | -0.210          | 0.096 | -2.192  | -0.109    | 0.057             |
| MAP | STE | -0.635          | 0.096 | -6.627  | -0.329    | < .001            |
|     | PAS | -1.304          | 0.096 | -13.615 | -0.677    | < .001            |
|     | HPP | -0.380          | 0.096 | -3.971  | -0.197    | < .001            |

**Table S1. Post Hoc Comparisons - Methods**

|     |     | Mean Difference | SE    | t      | Cohen's d | p <sub>holm</sub> |
|-----|-----|-----------------|-------|--------|-----------|-------------------|
|     | MWV | 1.064           | 0.096 | 11.113 | 0.552     | < .001            |
| STE | PAS | -0.669          | 0.096 | -6.988 | -0.347    | < .001            |
|     | HPP | 0.254           | 0.096 | 2.656  | 0.132     | 0.027             |
|     | MWV | 1.699           | 0.096 | 17.740 | 0.882     | < .001            |
| PAS | HPP | 0.923           | 0.096 | 9.644  | 0.479     | < .001            |
|     | MWV | 2.368           | 0.096 | 24.728 | 1.229     | < .001            |
| HPP | MWV | 1.444           | 0.096 | 15.084 | 0.750     | < .001            |

*Note.* Cohen's d does not correct for multiple comparisons.

*Note.* P-value adjusted for comparing a family of 28

*Note.* PRE – addition of preservatives; IRR – irradiation preservation; RWV – radio wave preservation; MAP – packaging in modified atmosphere preservation; STE – sterilisation; PAS – pasteurisation; HPP – high pressure processing; MWV – microwave preservation).

**Table S2. Post Hoc Comparisons - In-store behaviour \* Methods**

|                 |                 | Mean Difference | SE    | t       | p <sub>holm</sub> |
|-----------------|-----------------|-----------------|-------|---------|-------------------|
| No, Verify, PRE | Verify, PRE     | 0.014           | 0.163 | 0.087   | 1.000             |
|                 | No, Verify, IRR | 0.380           | 0.122 | 3.119   | 0.057             |
|                 | Verify, IRR     | 0.079           | 0.163 | 0.482   | 1.000             |
|                 | No, Verify, RWV | -0.008          | 0.122 | -0.066  | 1.000             |
|                 | Verify, RWV     | -0.399          | 0.163 | -2.439  | 0.400             |
|                 | No, Verify, MAP | -1.292          | 0.122 | -10.603 | < .001            |
|                 | Verify, MAP     | -1.657          | 0.163 | -10.136 | < .001            |
|                 | No, Verify, STE | -1.972          | 0.122 | -16.184 | < .001            |

**Table S2. Post Hoc Comparisons - In-store behaviour \* Methods**

|                 |                 | Mean Difference | SE    | t       | p <sub>holm</sub> |
|-----------------|-----------------|-----------------|-------|---------|-------------------|
| Verify, PRE     | Verify, STE     | -2.218          | 0.163 | -13.570 | < .001            |
|                 | No, Verify, PAS | -2.732          | 0.122 | -22.421 | < .001            |
|                 | Verify, PAS     | -2.741          | 0.163 | -16.767 | < .001            |
|                 | No, Verify, HPP | -1.712          | 0.122 | -14.050 | < .001            |
|                 | Verify, HPP     | -1.973          | 0.163 | -12.070 | < .001            |
|                 | No, Verify, MWV | -0.260          | 0.122 | -2.134  | 0.758             |
|                 | Verify, MWV     | -0.541          | 0.163 | -3.308  | 0.033             |
|                 | No, Verify, IRR | 0.366           | 0.163 | 2.238   | 0.633             |
|                 | Verify, IRR     | 0.065           | 0.155 | 0.417   | 1.000             |
|                 | No, Verify, RWV | -0.022          | 0.163 | -0.136  | 1.000             |
|                 | Verify, RWV     | -0.413          | 0.155 | -2.668  | 0.215             |
|                 | No, Verify, MAP | -1.306          | 0.163 | -7.991  | < .001            |
|                 | Verify, MAP     | -1.671          | 0.155 | -10.798 | < .001            |
|                 | No, Verify, STE | -1.986          | 0.163 | -12.152 | < .001            |
|                 | Verify, STE     | -2.232          | 0.155 | -14.425 | < .001            |
|                 | No, Verify, PAS | -2.746          | 0.163 | -16.801 | < .001            |
|                 | Verify, PAS     | -2.755          | 0.155 | -17.802 | < .001            |
|                 | No, Verify, HPP | -1.726          | 0.163 | -10.561 | < .001            |
|                 | Verify, HPP     | -1.987          | 0.155 | -12.841 | < .001            |
|                 | No, Verify, MWV | -0.274          | 0.163 | -1.678  | 1.000             |
|                 | Verify, MWV     | -0.555          | 0.155 | -3.585  | 0.013             |
| No, Verify, IRR | Verify, IRR     | -0.301          | 0.163 | -1.843  | 1.000             |

**Table S2. Post Hoc Comparisons - In-store behaviour \* Methods**

|             |                 | Mean Difference | SE    | t       | p <sub>holm</sub> |
|-------------|-----------------|-----------------|-------|---------|-------------------|
|             | No, Verify, RWV | -0.388          | 0.122 | -3.184  | 0.048             |
|             | Verify, RWV     | -0.779          | 0.163 | -4.764  | < .001            |
|             | No, Verify, MAP | -1.672          | 0.122 | -13.722 | < .001            |
|             | Verify, MAP     | -2.037          | 0.163 | -12.461 | < .001            |
|             | No, Verify, STE | -2.352          | 0.122 | -19.302 | < .001            |
|             | Verify, STE     | -2.598          | 0.163 | -15.895 | < .001            |
|             | No, Verify, PAS | -3.112          | 0.122 | -25.539 | < .001            |
|             | Verify, PAS     | -3.121          | 0.163 | -19.092 | < .001            |
|             | No, Verify, HPP | -2.092          | 0.122 | -17.168 | < .001            |
|             | Verify, HPP     | -2.353          | 0.163 | -14.395 | < .001            |
|             | No, Verify, MWV | -0.640          | 0.122 | -5.252  | < .001            |
|             | Verify, MWV     | -0.921          | 0.163 | -5.633  | < .001            |
| Verify, IRR | No, Verify, RWV | -0.087          | 0.163 | -0.530  | 1.000             |
|             | Verify, RWV     | -0.477          | 0.155 | -3.085  | 0.060             |
|             | No, Verify, MAP | -1.371          | 0.163 | -8.386  | < .001            |
|             | Verify, MAP     | -1.735          | 0.155 | -11.215 | < .001            |
|             | No, Verify, STE | -2.051          | 0.163 | -12.546 | < .001            |
|             | Verify, STE     | -2.297          | 0.155 | -14.842 | < .001            |
|             | No, Verify, PAS | -2.811          | 0.163 | -17.196 | < .001            |
|             | Verify, PAS     | -2.819          | 0.155 | -18.219 | < .001            |
|             | No, Verify, HPP | -1.791          | 0.163 | -10.956 | < .001            |
|             | Verify, HPP     | -2.052          | 0.155 | -13.257 | < .001            |

**Table S2. Post Hoc Comparisons - In-store behaviour \* Methods**

|                 |                 | Mean Difference | SE    | t       | p <sub>holm</sub> |
|-----------------|-----------------|-----------------|-------|---------|-------------------|
| No, Verify, RWV | No, Verify, MWV | -0.339          | 0.163 | -2.072  | 0.806             |
|                 | Verify, MWV     | -0.619          | 0.155 | -4.002  | 0.003             |
|                 | Verify, RWV     | -0.391          | 0.163 | -2.390  | 0.440             |
|                 | No, Verify, MAP | -1.284          | 0.122 | -10.537 | < .001            |
|                 | Verify, MAP     | -1.649          | 0.163 | -10.087 | < .001            |
|                 | No, Verify, STE | -1.964          | 0.122 | -16.118 | < .001            |
|                 | Verify, STE     | -2.210          | 0.163 | -13.521 | < .001            |
|                 | No, Verify, PAS | -2.724          | 0.122 | -22.355 | < .001            |
|                 | Verify, PAS     | -2.733          | 0.163 | -16.718 | < .001            |
|                 | No, Verify, HPP | -1.704          | 0.122 | -13.984 | < .001            |
|                 | Verify, HPP     | -1.965          | 0.163 | -12.021 | < .001            |
|                 | No, Verify, MWV | -0.252          | 0.122 | -2.068  | 0.806             |
| Verify, RWV     | Verify, MWV     | -0.533          | 0.163 | -3.259  | 0.039             |
|                 | No, Verify, MAP | -0.893          | 0.163 | -5.465  | < .001            |
|                 | Verify, MAP     | -1.258          | 0.155 | -8.130  | < .001            |
|                 | No, Verify, STE | -1.573          | 0.163 | -9.625  | < .001            |
|                 | Verify, STE     | -1.819          | 0.155 | -11.757 | < .001            |
|                 | No, Verify, PAS | -2.333          | 0.163 | -14.275 | < .001            |
|                 | Verify, PAS     | -2.342          | 0.155 | -15.134 | < .001            |
|                 | No, Verify, HPP | -1.313          | 0.163 | -8.035  | < .001            |
|                 | Verify, HPP     | -1.574          | 0.155 | -10.172 | < .001            |
|                 | No, Verify, MWV | 0.139           | 0.163 | 0.849   | 1.000             |

**Table S2. Post Hoc Comparisons - In-store behaviour \* Methods**

|                 |                 | Mean Difference | SE    | t       | p <sub>holm</sub> |
|-----------------|-----------------|-----------------|-------|---------|-------------------|
| No, Verify, MAP | Verify, MWV     | -0.142          | 0.155 | -0.917  | 1.000             |
|                 | Verify, MAP     | -0.365          | 0.163 | -2.232  | 0.633             |
|                 | No, Verify, STE | -0.680          | 0.122 | -5.581  | < .001            |
|                 | Verify, STE     | -0.926          | 0.163 | -5.666  | < .001            |
|                 | No, Verify, PAS | -1.440          | 0.122 | -11.818 | < .001            |
|                 | Verify, PAS     | -1.449          | 0.163 | -8.863  | < .001            |
|                 | No, Verify, HPP | -0.420          | 0.122 | -3.447  | 0.021             |
|                 | Verify, HPP     | -0.681          | 0.163 | -4.166  | 0.001             |
|                 | No, Verify, MWV | 1.032           | 0.122 | 8.469   | < .001            |
| Verify, MAP     | Verify, MWV     | 0.751           | 0.163 | 4.597   | < .001            |
|                 | No, Verify, STE | -0.315          | 0.163 | -1.929  | 0.971             |
|                 | Verify, STE     | -0.561          | 0.155 | -3.627  | 0.011             |
|                 | No, Verify, PAS | -1.075          | 0.163 | -6.578  | < .001            |
|                 | Verify, PAS     | -1.084          | 0.155 | -7.004  | < .001            |
|                 | No, Verify, HPP | -0.055          | 0.163 | -0.338  | 1.000             |
|                 | Verify, HPP     | -0.316          | 0.155 | -2.043  | 0.806             |
|                 | No, Verify, MWV | 1.397           | 0.163 | 8.545   | < .001            |
|                 | Verify, MWV     | 1.116           | 0.155 | 7.212   | < .001            |
| No, Verify, STE | Verify, STE     | -0.246          | 0.163 | -1.505  | 1.000             |
|                 | No, Verify, PAS | -0.760          | 0.122 | -6.237  | < .001            |
|                 | Verify, PAS     | -0.769          | 0.163 | -4.703  | < .001            |
|                 | No, Verify, HPP | 0.260           | 0.122 | 2.134   | 0.758             |

**Table S2. Post Hoc Comparisons - In-store behaviour \* Methods**

|                 |                 | Mean Difference | SE    | t      | p <sub>holm</sub> |
|-----------------|-----------------|-----------------|-------|--------|-------------------|
| Verify, STE     | Verify, HPP     | -9.032e -4      | 0.163 | -0.006 | 1.000             |
|                 | No, Verify, MWV | 1.712           | 0.122 | 14.050 | < .001            |
|                 | Verify, MWV     | 1.431           | 0.163 | 8.757  | < .001            |
|                 | No, Verify, PAS | -0.514          | 0.163 | -3.144 | 0.054             |
|                 | Verify, PAS     | -0.523          | 0.155 | -3.377 | 0.027             |
|                 | No, Verify, HPP | 0.506           | 0.163 | 3.096  | 0.060             |
|                 | Verify, HPP     | 0.245           | 0.155 | 1.584  | 1.000             |
| No, Verify, PAS | No, Verify, MWV | 1.958           | 0.163 | 11.979 | < .001            |
|                 | Verify, MWV     | 1.677           | 0.155 | 10.839 | < .001            |
|                 | Verify, PAS     | -0.009          | 0.163 | -0.053 | 1.000             |
|                 | No, Verify, HPP | 1.020           | 0.122 | 8.371  | < .001            |
|                 | Verify, HPP     | 0.759           | 0.163 | 4.644  | < .001            |
|                 | No, Verify, MWV | 2.472           | 0.122 | 20.287 | < .001            |
|                 | Verify, MWV     | 2.191           | 0.163 | 13.407 | < .001            |
| Verify, PAS     | No, Verify, HPP | 1.029           | 0.163 | 6.293  | < .001            |
|                 | Verify, HPP     | 0.768           | 0.155 | 4.961  | < .001            |
|                 | No, Verify, MWV | 2.481           | 0.163 | 15.177 | < .001            |
|                 | Verify, MWV     | 2.200           | 0.155 | 14.216 | < .001            |
| No, Verify, HPP | Verify, HPP     | -0.261          | 0.163 | -1.596 | 1.000             |
|                 | No, Verify, MWV | 1.452           | 0.122 | 11.916 | < .001            |
|                 | Verify, MWV     | 1.171           | 0.163 | 7.166  | < .001            |
| Verify, HPP     | No, Verify, MWV | 1.713           | 0.163 | 10.480 | < .001            |

**Table S2. Post Hoc Comparisons - In-store behaviour \* Methods**

|                 |             | Mean Difference | SE    | t      | p <sub>holm</sub> |
|-----------------|-------------|-----------------|-------|--------|-------------------|
|                 | Verify, MWV | 1.432           | 0.155 | 9.255  | < .001            |
| No, Verify, MWV | Verify, MWV | -0.281          | 0.163 | -1.717 | 1.000             |

*Note.* P-value adjusted for comparing a family of 120

*Note.* PRE – addition of preservatives; IRR – irradiation preservation; RWV – radio wave preservation; MAP – packaging in modified atmosphere preservation; STE – sterilisation; PAS – pasteurisation; HPP – high pressure processing; MWV – microwave preservation).

**Table S3. Post Hoc Comparisons - Education level \* Methods**

|        |        | Mean Difference | SE    | t       | p <sub>holm</sub> |
|--------|--------|-----------------|-------|---------|-------------------|
| 1, PRE | 2, PRE | -0.423          | 0.195 | -2.170  | 1.000             |
|        | 3, PRE | 0.280           | 0.195 | 1.439   | 1.000             |
|        | 1, IRR | 0.395           | 0.168 | 2.348   | 1.000             |
|        | 2, IRR | 0.172           | 0.195 | 0.881   | 1.000             |
|        | 3, IRR | 0.077           | 0.195 | 0.397   | 1.000             |
|        | 1, RWV | 0.023           | 0.168 | 0.138   | 1.000             |
|        | 2, RWV | -0.292          | 0.195 | -1.501  | 1.000             |
|        | 3, RWV | -0.350          | 0.195 | -1.798  | 1.000             |
|        | 1, MAP | -1.132          | 0.168 | -6.722  | < .001            |
|        | 2, MAP | -1.510          | 0.195 | -7.752  | < .001            |
|        | 3, MAP | -1.792          | 0.195 | -9.204  | < .001            |
|        | 1, STE | -1.915          | 0.168 | -11.372 | < .001            |



**Table S3. Post Hoc Comparisons - Education level \* Methods**

|        |        | Mean Difference | SE    | t       | p <sub>holm</sub> |
|--------|--------|-----------------|-------|---------|-------------------|
| 2, PRE | 2, STE | -2.162          | 0.195 | -11.101 | < .001            |
|        | 3, STE | -2.270          | 0.195 | -11.660 | < .001            |
|        | 1, PAS | -2.984          | 0.168 | -17.725 | < .001            |
|        | 2, PAS | -2.495          | 0.195 | -12.813 | < .001            |
|        | 3, PAS | -2.901          | 0.195 | -14.897 | < .001            |
|        | 1, HPP | -1.504          | 0.168 | -8.932  | < .001            |
|        | 2, HPP | -2.104          | 0.195 | -10.804 | < .001            |
|        | 3, HPP | -1.966          | 0.195 | -10.097 | < .001            |
|        | 1, MWV | -0.016          | 0.168 | -0.092  | 1.000             |
|        | 2, MWV | -0.589          | 0.195 | -3.026  | 0.205             |
|        | 3, MWV | -0.633          | 0.195 | -3.250  | 0.101             |
|        | 3, PRE | 0.703           | 0.191 | 3.672   | 0.024             |
|        | 1, IRR | 0.818           | 0.195 | 4.201   | 0.003             |
|        | 2, IRR | 0.594           | 0.163 | 3.650   | 0.025             |
|        | 3, IRR | 0.500           | 0.191 | 2.612   | 0.653             |
|        | 1, RWV | 0.446           | 0.195 | 2.290   | 1.000             |
|        | 2, RWV | 0.130           | 0.163 | 0.801   | 1.000             |
|        | 3, RWV | 0.072           | 0.191 | 0.379   | 1.000             |
|        | 1, MAP | -0.709          | 0.195 | -3.642  | 0.026             |
|        | 2, MAP | -1.087          | 0.163 | -6.677  | < .001            |
|        | 3, MAP | -1.370          | 0.191 | -7.155  | < .001            |
|        | 1, STE | -1.492          | 0.195 | -7.662  | < .001            |

**Table S3. Post Hoc Comparisons - Education level \* Methods**

|        |        | Mean Difference | SE    | t       | p <sub>holm</sub> |
|--------|--------|-----------------|-------|---------|-------------------|
| 3, PRE | 2, STE | -1.739          | 0.163 | -10.683 | < .001            |
|        | 3, STE | -1.848          | 0.191 | -9.653  | < .001            |
|        | 1, PAS | -2.562          | 0.195 | -13.156 | < .001            |
|        | 2, PAS | -2.072          | 0.163 | -12.731 | < .001            |
|        | 3, PAS | -2.478          | 0.191 | -12.947 | < .001            |
|        | 1, HPP | -1.081          | 0.195 | -5.552  | < .001            |
|        | 2, HPP | -1.681          | 0.163 | -10.327 | < .001            |
|        | 3, HPP | -1.543          | 0.191 | -8.063  | < .001            |
|        | 1, MWV | 0.407           | 0.195 | 2.091   | 1.000             |
|        | 2, MWV | -0.167          | 0.163 | -1.024  | 1.000             |
|        | 3, MWV | -0.210          | 0.191 | -1.098  | 1.000             |
|        | 1, IRR | 0.115           | 0.195 | 0.591   | 1.000             |
|        | 2, IRR | -0.109          | 0.191 | -0.568  | 1.000             |
|        | 3, IRR | -0.203          | 0.163 | -1.246  | 1.000             |
|        | 1, RWV | -0.257          | 0.195 | -1.320  | 1.000             |
|        | 2, RWV | -0.572          | 0.191 | -2.991  | 0.228             |
|        | 3, RWV | -0.630          | 0.163 | -3.873  | 0.011             |
|        | 1, MAP | -1.412          | 0.195 | -7.251  | < .001            |
|        | 2, MAP | -1.790          | 0.191 | -9.350  | < .001            |
|        | 3, MAP | -2.072          | 0.163 | -12.731 | < .001            |
|        | 1, STE | -2.195          | 0.195 | -11.272 | < .001            |
|        | 2, STE | -2.442          | 0.191 | -12.758 | < .001            |

**Table S3. Post Hoc Comparisons - Education level \* Methods**

|        |        | Mean Difference | SE    | t       | p <sub>holm</sub> |
|--------|--------|-----------------|-------|---------|-------------------|
| 1, IRR | 3, STE | -2.551          | 0.163 | -15.669 | < .001            |
|        | 1, PAS | -3.265          | 0.195 | -16.766 | < .001            |
|        | 2, PAS | -2.775          | 0.191 | -14.499 | < .001            |
|        | 3, PAS | -3.181          | 0.163 | -19.541 | < .001            |
|        | 1, HPP | -1.784          | 0.195 | -9.162  | < .001            |
|        | 2, HPP | -2.384          | 0.191 | -12.455 | < .001            |
|        | 3, HPP | -2.246          | 0.163 | -13.799 | < .001            |
|        | 1, MWV | -0.296          | 0.195 | -1.519  | 1.000             |
|        | 2, MWV | -0.870          | 0.191 | -4.543  | < .001            |
|        | 3, MWV | -0.913          | 0.163 | -5.609  | < .001            |
|        | 2, IRR | -0.224          | 0.195 | -1.149  | 1.000             |
|        | 3, IRR | -0.318          | 0.195 | -1.633  | 1.000             |
|        | 1, RWV | -0.372          | 0.168 | -2.210  | 1.000             |
|        | 2, RWV | -0.688          | 0.195 | -3.531  | 0.039             |
|        | 3, RWV | -0.746          | 0.195 | -3.829  | 0.013             |
|        | 1, MAP | -1.527          | 0.168 | -9.070  | < .001            |
|        | 2, MAP | -1.905          | 0.195 | -9.783  | < .001            |
|        | 3, MAP | -2.188          | 0.195 | -11.234 | < .001            |
|        | 1, STE | -2.310          | 0.168 | -13.720 | < .001            |
|        | 2, STE | -2.557          | 0.195 | -13.132 | < .001            |
|        | 3, STE | -2.666          | 0.195 | -13.690 | < .001            |
|        | 1, PAS | -3.380          | 0.168 | -20.073 | < .001            |

**Table S3. Post Hoc Comparisons - Education level \* Methods**

|        |        | Mean Difference | SE    | t       | p <sub>holm</sub> |
|--------|--------|-----------------|-------|---------|-------------------|
| 2, IRR | 2, PAS | -2.890          | 0.195 | -14.844 | < .001            |
|        | 3, PAS | -3.296          | 0.195 | -16.927 | < .001            |
|        | 1, HPP | -1.899          | 0.168 | -11.280 | < .001            |
|        | 2, HPP | -2.499          | 0.195 | -12.834 | < .001            |
|        | 3, HPP | -2.361          | 0.195 | -12.127 | < .001            |
|        | 1, MWV | -0.411          | 0.168 | -2.440  | 1.000             |
|        | 2, MWV | -0.985          | 0.195 | -5.057  | < .001            |
|        | 3, MWV | -1.028          | 0.195 | -5.280  | < .001            |
|        | 3, IRR | -0.094          | 0.191 | -0.492  | 1.000             |
|        | 1, RWV | -0.148          | 0.195 | -0.762  | 1.000             |
|        | 2, RWV | -0.464          | 0.163 | -2.849  | 0.340             |
|        | 3, RWV | -0.522          | 0.191 | -2.726  | 0.479             |
|        | 1, MAP | -1.303          | 0.195 | -6.693  | < .001            |
|        | 2, MAP | -1.681          | 0.163 | -10.327 | < .001            |
|        | 3, MAP | -1.964          | 0.191 | -10.259 | < .001            |
|        | 1, STE | -2.086          | 0.195 | -10.714 | < .001            |
|        | 2, STE | -2.333          | 0.163 | -14.333 | < .001            |
|        | 3, STE | -2.442          | 0.191 | -12.758 | < .001            |
|        | 1, PAS | -3.156          | 0.195 | -16.207 | < .001            |
|        | 2, PAS | -2.667          | 0.163 | -16.381 | < .001            |
|        | 3, PAS | -3.072          | 0.191 | -16.051 | < .001            |
|        | 1, HPP | -1.675          | 0.195 | -8.604  | < .001            |

**Table S3. Post Hoc Comparisons - Education level \* Methods**

|        |        | Mean Difference | SE    | t       | p <sub>holm</sub> |
|--------|--------|-----------------|-------|---------|-------------------|
| 3, IRR | 2, HPP | -2.275          | 0.163 | -13.977 | < .001            |
|        | 3, HPP | -2.138          | 0.191 | -11.168 | < .001            |
|        | 1, MWV | -0.187          | 0.195 | -0.961  | 1.000             |
|        | 2, MWV | -0.761          | 0.163 | -4.674  | < .001            |
|        | 3, MWV | -0.804          | 0.191 | -4.202  | 0.003             |
|        | 1, RWV | -0.054          | 0.195 | -0.278  | 1.000             |
|        | 2, RWV | -0.370          | 0.191 | -1.931  | 1.000             |
|        | 3, RWV | -0.428          | 0.163 | -2.626  | 0.634             |
|        | 1, MAP | -1.209          | 0.195 | -6.209  | < .001            |
|        | 2, MAP | -1.587          | 0.191 | -8.291  | < .001            |
|        | 3, MAP | -1.870          | 0.163 | -11.484 | < .001            |
|        | 1, STE | -1.992          | 0.195 | -10.230 | < .001            |
|        | 2, STE | -2.239          | 0.191 | -11.698 | < .001            |
|        | 3, STE | -2.348          | 0.163 | -14.422 | < .001            |
|        | 1, PAS | -3.062          | 0.195 | -15.724 | < .001            |
|        | 2, PAS | -2.572          | 0.191 | -13.439 | < .001            |
|        | 3, PAS | -2.978          | 0.163 | -18.295 | < .001            |
|        | 1, HPP | -1.581          | 0.195 | -8.120  | < .001            |
|        | 2, HPP | -2.181          | 0.191 | -11.395 | < .001            |
|        | 3, HPP | -2.043          | 0.163 | -12.553 | < .001            |
|        | 1, MWV | -0.093          | 0.195 | -0.477  | 1.000             |
|        | 2, MWV | -0.667          | 0.191 | -3.483  | 0.046             |

**Table S3. Post Hoc Comparisons - Education level \* Methods**

|        |        | Mean Difference | SE    | t       | p <sub>holm</sub> |
|--------|--------|-----------------|-------|---------|-------------------|
| 1, RWV | 3, MWV | -0.710          | 0.163 | -4.362  | 0.001             |
|        | 2, RWV | -0.315          | 0.195 | -1.620  | 1.000             |
|        | 3, RWV | -0.373          | 0.195 | -1.918  | 1.000             |
|        | 1, MAP | -1.155          | 0.168 | -6.860  | < .001            |
|        | 2, MAP | -1.533          | 0.195 | -7.872  | < .001            |
|        | 3, MAP | -1.815          | 0.195 | -9.323  | < .001            |
|        | 1, STE | -1.938          | 0.168 | -11.510 | < .001            |
|        | 2, STE | -2.185          | 0.195 | -11.221 | < .001            |
|        | 3, STE | -2.294          | 0.195 | -11.779 | < .001            |
|        | 1, PAS | -3.008          | 0.168 | -17.863 | < .001            |
|        | 2, PAS | -2.518          | 0.195 | -12.933 | < .001            |
|        | 3, PAS | -2.924          | 0.195 | -15.017 | < .001            |
|        | 1, HPP | -1.527          | 0.168 | -9.070  | < .001            |
|        | 2, HPP | -2.127          | 0.195 | -10.923 | < .001            |
|        | 3, HPP | -1.989          | 0.195 | -10.216 | < .001            |
| 2, RWV | 1, MWV | -0.039          | 0.168 | -0.230  | 1.000             |
|        | 2, MWV | -0.613          | 0.195 | -3.146  | 0.141             |
|        | 3, MWV | -0.656          | 0.195 | -3.369  | 0.067             |
|        | 3, RWV | -0.058          | 0.191 | -0.303  | 1.000             |
|        | 1, MAP | -0.840          | 0.195 | -4.311  | 0.002             |
|        | 2, MAP | -1.217          | 0.163 | -7.478  | < .001            |
|        | 3, MAP | -1.500          | 0.191 | -7.836  | < .001            |

**Table S3. Post Hoc Comparisons - Education level \* Methods**

|        |        | Mean Difference | SE    | t       | p <sub>holm</sub> |
|--------|--------|-----------------|-------|---------|-------------------|
| 3, RWV | 1, STE | -1.623          | 0.195 | -8.332  | < .001            |
|        | 2, STE | -1.870          | 0.163 | -11.484 | < .001            |
|        | 3, STE | -1.978          | 0.191 | -10.335 | < .001            |
|        | 1, PAS | -2.692          | 0.195 | -13.826 | < .001            |
|        | 2, PAS | -2.203          | 0.163 | -13.532 | < .001            |
|        | 3, PAS | -2.609          | 0.191 | -13.628 | < .001            |
|        | 1, HPP | -1.212          | 0.195 | -6.222  | < .001            |
|        | 2, HPP | -1.812          | 0.163 | -11.128 | < .001            |
|        | 3, HPP | -1.674          | 0.191 | -8.745  | < .001            |
|        | 1, MWV | 0.277           | 0.195 | 1.421   | 1.000             |
|        | 2, MWV | -0.297          | 0.163 | -1.825  | 1.000             |
|        | 3, MWV | -0.341          | 0.191 | -1.779  | 1.000             |
|        | 1, MAP | -0.782          | 0.195 | -4.014  | 0.006             |
|        | 2, MAP | -1.159          | 0.191 | -6.057  | < .001            |
|        | 3, MAP | -1.442          | 0.163 | -8.858  | < .001            |
|        | 1, STE | -1.565          | 0.195 | -8.034  | < .001            |
|        | 2, STE | -1.812          | 0.191 | -9.464  | < .001            |
|        | 3, STE | -1.920          | 0.163 | -11.796 | < .001            |
|        | 1, PAS | -2.634          | 0.195 | -13.528 | < .001            |
|        | 2, PAS | -2.145          | 0.191 | -11.205 | < .001            |
|        | 3, PAS | -2.551          | 0.163 | -15.669 | < .001            |
|        | 1, HPP | -1.154          | 0.195 | -5.925  | < .001            |

**Table S3. Post Hoc Comparisons - Education level \* Methods**

|        |        | Mean Difference | SE    | t       | p <sub>holm</sub> |
|--------|--------|-----------------|-------|---------|-------------------|
| 1, MAP | 2, HPP | -1.754          | 0.191 | -9.161  | < .001            |
|        | 3, HPP | -1.616          | 0.163 | -9.926  | < .001            |
|        | 1, MWV | 0.335           | 0.195 | 1.719   | 1.000             |
|        | 2, MWV | -0.239          | 0.191 | -1.249  | 1.000             |
|        | 3, MWV | -0.283          | 0.163 | -1.736  | 1.000             |
|        | 2, MAP | -0.378          | 0.195 | -1.940  | 1.000             |
|        | 3, MAP | -0.660          | 0.195 | -3.392  | 0.063             |
|        | 1, STE | -0.783          | 0.168 | -4.650  | < .001            |
|        | 2, STE | -1.030          | 0.195 | -5.289  | < .001            |
|        | 3, STE | -1.139          | 0.195 | -5.848  | < .001            |
|        | 1, PAS | -1.853          | 0.168 | -11.004 | < .001            |
|        | 2, PAS | -1.363          | 0.195 | -7.001  | < .001            |
|        | 3, PAS | -1.769          | 0.195 | -9.085  | < .001            |
|        | 1, HPP | -0.372          | 0.168 | -2.210  | 1.000             |
|        | 2, HPP | -0.972          | 0.195 | -4.992  | < .001            |
|        | 3, HPP | -0.834          | 0.195 | -4.285  | 0.002             |
|        | 1, MWV | 1.116           | 0.168 | 6.630   | < .001            |
|        | 2, MWV | 0.542           | 0.195 | 2.786   | 0.410             |
|        | 3, MWV | 0.499           | 0.195 | 2.562   | 0.743             |
| 2, MAP | 3, MAP | -0.283          | 0.191 | -1.476  | 1.000             |
|        | 1, STE | -0.405          | 0.195 | -2.080  | 1.000             |
|        | 2, STE | -0.652          | 0.163 | -4.006  | 0.007             |



**Table S3. Post Hoc Comparisons - Education level \* Methods**

|        |        | Mean Difference | SE    | t      | p <sub>holm</sub> |
|--------|--------|-----------------|-------|--------|-------------------|
| 3, MAP | 3, STE | -0.761          | 0.191 | -3.975 | 0.007             |
|        | 1, PAS | -1.475          | 0.195 | -7.574 | < .001            |
|        | 2, PAS | -0.986          | 0.163 | -6.054 | < .001            |
|        | 3, PAS | -1.391          | 0.191 | -7.268 | < .001            |
|        | 1, HPP | 0.006           | 0.195 | 0.029  | 1.000             |
|        | 2, HPP | -0.594          | 0.163 | -3.650 | 0.025             |
|        | 3, HPP | -0.457          | 0.191 | -2.385 | 1.000             |
|        | 1, MWV | 1.494           | 0.195 | 7.673  | < .001            |
|        | 2, MWV | 0.920           | 0.163 | 5.653  | < .001            |
|        | 3, MWV | 0.877           | 0.191 | 4.581  | < .001            |
|        | 1, STE | -0.123          | 0.195 | -0.629 | 1.000             |
|        | 2, STE | -0.370          | 0.191 | -1.931 | 1.000             |
|        | 3, STE | -0.478          | 0.163 | -2.938 | 0.260             |
|        | 1, PAS | -1.192          | 0.195 | -6.123 | < .001            |
|        | 2, PAS | -0.703          | 0.191 | -3.672 | 0.024             |
|        | 3, PAS | -1.109          | 0.163 | -6.811 | < .001            |
|        | 1, HPP | 0.288           | 0.195 | 1.481  | 1.000             |
|        | 2, HPP | -0.312          | 0.191 | -1.628 | 1.000             |
|        | 3, HPP | -0.174          | 0.163 | -1.068 | 1.000             |
|        | 1, MWV | 1.777           | 0.195 | 9.124  | < .001            |
|        | 2, MWV | 1.203           | 0.191 | 6.284  | < .001            |
|        | 3, MWV | 1.159           | 0.163 | 7.122  | < .001            |

**Table S3. Post Hoc Comparisons - Education level \* Methods**

|        |        | Mean Difference | SE    | t      | p <sub>holm</sub> |
|--------|--------|-----------------|-------|--------|-------------------|
| 1, STE | 2, STE | -0.247          | 0.195 | -1.269 | 1.000             |
|        | 3, STE | -0.356          | 0.195 | -1.827 | 1.000             |
|        | 1, PAS | -1.070          | 0.168 | -6.353 | < .001            |
|        | 2, PAS | -0.580          | 0.195 | -2.980 | 0.233             |
|        | 3, PAS | -0.986          | 0.195 | -5.064 | < .001            |
|        | 1, HPP | 0.411           | 0.168 | 2.440  | 1.000             |
|        | 2, HPP | -0.189          | 0.195 | -0.971 | 1.000             |
|        | 3, HPP | -0.051          | 0.195 | -0.264 | 1.000             |
|        | 1, MWV | 1.899           | 0.168 | 11.280 | < .001            |
|        | 2, MWV | 1.325           | 0.195 | 6.806  | < .001            |
|        | 3, MWV | 1.282           | 0.195 | 6.583  | < .001            |
| 2, STE | 3, STE | -0.109          | 0.191 | -0.568 | 1.000             |
|        | 1, PAS | -0.823          | 0.195 | -4.225 | 0.003             |
|        | 2, PAS | -0.333          | 0.163 | -2.048 | 1.000             |
|        | 3, PAS | -0.739          | 0.191 | -3.861 | 0.012             |
|        | 1, HPP | 0.658           | 0.195 | 3.379  | 0.065             |
|        | 2, HPP | 0.058           | 0.163 | 0.356  | 1.000             |
|        | 3, HPP | 0.196           | 0.191 | 1.022  | 1.000             |
|        | 1, MWV | 2.146           | 0.195 | 11.022 | < .001            |
|        | 2, MWV | 1.572           | 0.163 | 9.659  | < .001            |
|        | 3, MWV | 1.529           | 0.191 | 7.988  | < .001            |
| 3, STE | 1, PAS | -0.714          | 0.195 | -3.667 | 0.024             |

**Table S3. Post Hoc Comparisons - Education level \* Methods**

|        |        | Mean Difference | SE    | t      | p <sub>holm</sub> |
|--------|--------|-----------------|-------|--------|-------------------|
| 1, PAS | 2, PAS | -0.225          | 0.191 | -1.174 | 1.000             |
|        | 3, PAS | -0.630          | 0.163 | -3.873 | 0.011             |
|        | 1, HPP | 0.767           | 0.195 | 3.937  | 0.009             |
|        | 2, HPP | 0.167           | 0.191 | 0.871  | 1.000             |
|        | 3, HPP | 0.304           | 0.163 | 1.870  | 1.000             |
|        | 1, MWV | 2.255           | 0.195 | 11.580 | < .001            |
|        | 2, MWV | 1.681           | 0.191 | 8.783  | < .001            |
|        | 3, MWV | 1.638           | 0.163 | 10.060 | < .001            |
|        | 2, PAS | 0.489           | 0.195 | 2.513  | 0.843             |
|        | 3, PAS | 0.084           | 0.195 | 0.429  | 1.000             |
|        | 1, HPP | 1.481           | 0.168 | 8.794  | < .001            |
|        | 2, HPP | 0.881           | 0.195 | 4.523  | < .001            |
|        | 3, HPP | 1.018           | 0.195 | 5.230  | < .001            |
|        | 1, MWV | 2.969           | 0.168 | 17.633 | < .001            |
|        | 2, MWV | 2.395           | 0.195 | 12.300 | < .001            |
|        | 3, MWV | 2.352           | 0.195 | 12.077 | < .001            |
|        | 3, PAS | -0.406          | 0.191 | -2.120 | 1.000             |
| 2, PAS | 1, HPP | 0.991           | 0.195 | 5.090  | < .001            |
|        | 2, HPP | 0.391           | 0.163 | 2.404  | 1.000             |
|        | 3, HPP | 0.529           | 0.191 | 2.764  | 0.433             |
|        | 1, MWV | 2.480           | 0.195 | 12.734 | < .001            |
|        | 2, MWV | 1.906           | 0.163 | 11.707 | < .001            |

**Table S3. Post Hoc Comparisons - Education level \* Methods**

|        |        | Mean Difference | SE    | t      | p <sub>holm</sub> |
|--------|--------|-----------------|-------|--------|-------------------|
| 3, PAS | 3, MWV | 1.862           | 0.191 | 9.729  | < .001            |
|        | 1, HPP | 1.397           | 0.195 | 7.174  | < .001            |
|        | 2, HPP | 0.797           | 0.191 | 4.164  | 0.003             |
|        | 3, HPP | 0.935           | 0.163 | 5.742  | < .001            |
|        | 1, MWV | 2.885           | 0.195 | 14.818 | < .001            |
| 1, HPP | 2, MWV | 2.312           | 0.191 | 12.076 | < .001            |
|        | 3, MWV | 2.268           | 0.163 | 13.933 | < .001            |
|        | 2, HPP | -0.600          | 0.195 | -3.081 | 0.174             |
|        | 3, HPP | -0.462          | 0.195 | -2.374 | 1.000             |
|        | 1, MWV | 1.488           | 0.168 | 8.840  | < .001            |
| 2, HPP | 2, MWV | 0.915           | 0.195 | 4.697  | < .001            |
|        | 3, MWV | 0.871           | 0.195 | 4.473  | < .001            |
|        | 3, HPP | 0.138           | 0.191 | 0.719  | 1.000             |
|        | 1, MWV | 2.088           | 0.195 | 10.724 | < .001            |
|        | 2, MWV | 1.514           | 0.163 | 9.303  | < .001            |
| 3, HPP | 3, MWV | 1.471           | 0.191 | 7.685  | < .001            |
|        | 1, MWV | 1.951           | 0.195 | 10.017 | < .001            |
|        | 2, MWV | 1.377           | 0.191 | 7.193  | < .001            |
|        | 3, MWV | 1.333           | 0.163 | 8.190  | < .001            |
|        | 2, MWV | -0.574          | 0.195 | -2.947 | 0.257             |
| 1, MWV | 3, MWV | -0.617          | 0.195 | -3.170 | 0.131             |
| 2, MWV | 3, MWV | -0.043          | 0.191 | -0.227 | 1.000             |

**Table S3. Post Hoc Comparisons - Education level \* Methods**

|  | Mean Difference | SE | t | p <sub>holm</sub> |
|--|-----------------|----|---|-------------------|
|--|-----------------|----|---|-------------------|

*Note.* P-value adjusted for comparing a family of 276

*Note.* PRE – addition of preservatives; IRR – irradiation preservation; RWV – radio wave preservation; MAP – packaging in modified atmosphere preservation; STE – sterilisation; PAS – pasteurisation; HPP – high pressure processing; MWV – microwave preservation).
